# Supplementary material
Source: publisher figshare collection journal article supplement (https://plos.figshare.com/articles/dataset/_/117949)
Supplement: Supplementary file [file 1]

Figure S1

A.

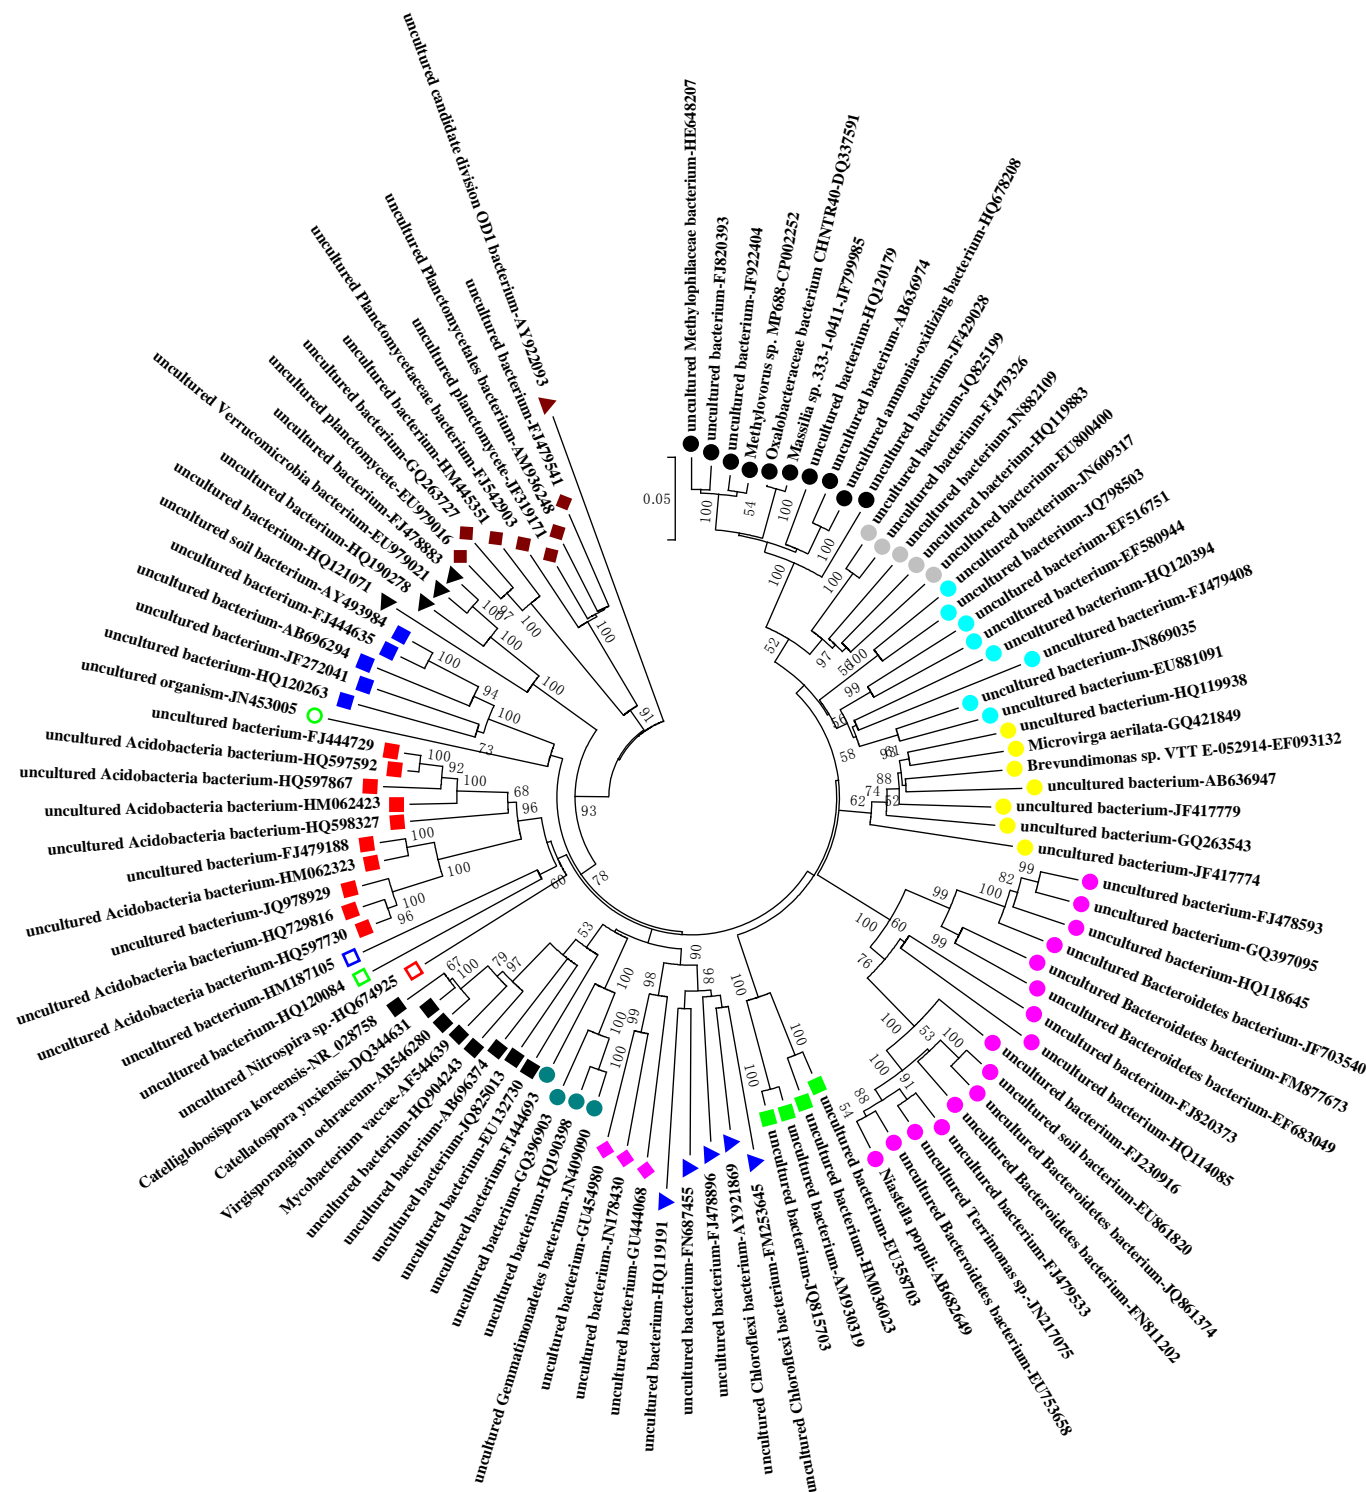

## B.

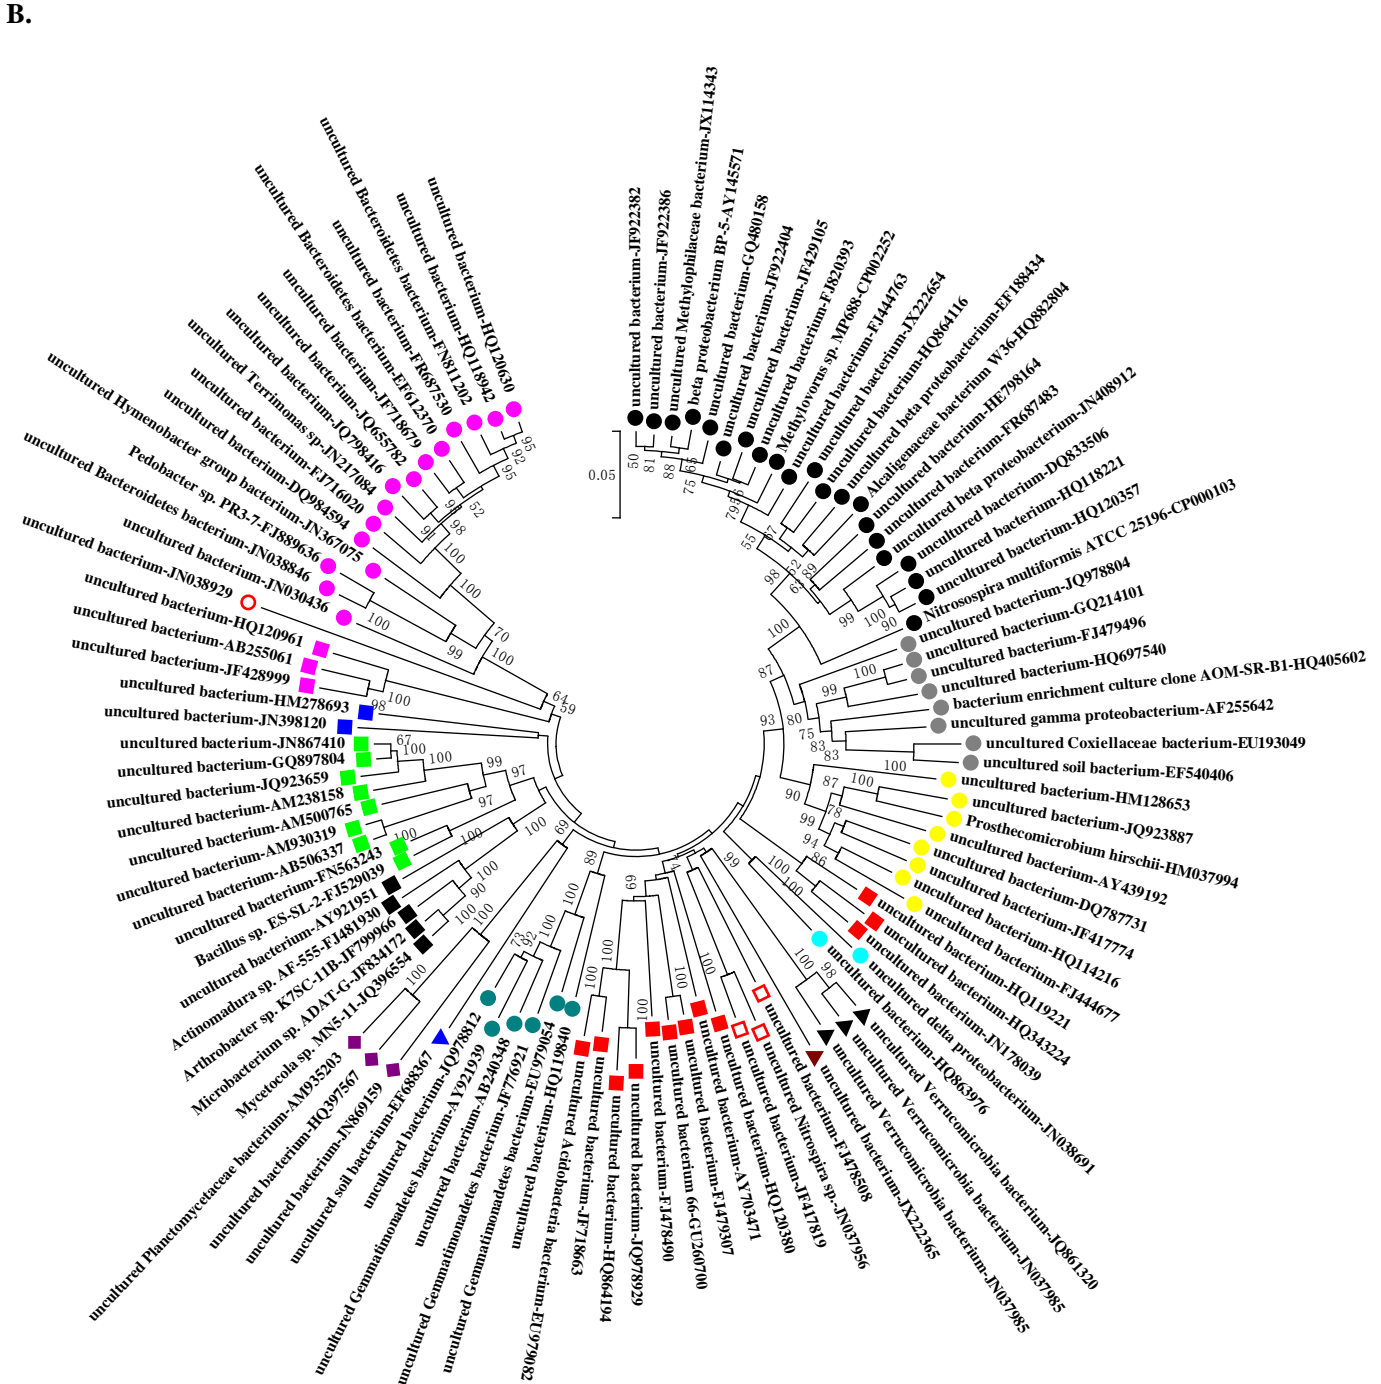

■, *Acidobacteria*; ■, *Actinobacteria*; ◆, *Armatimonadetes*; ●, *Bacteroidetes*; ■, *Candidate division TM7*; ▲, *Chloroflexi*; ■, *Cyanobacteria*; □, *Elusimicrobia*; □, *Fibrobacteres*; ■, *Firmicutes*; ●, *Gemmatimonadetes*; □, *Nitrospira*; ◆, *Planctomycetes*; ●, *Alphaproteobacteria*; ●, *Deltaproteobacteria*; ●, *Gammaproteobacteria*; ●, *Betaproteobacteria*; ○, *Spirochaetes*; ○, *Tenericute*; ▲, *Verrucomicrobia*; ▲, *Unclassified*
