# Supplementary material
Source: publisher figshare collection journal article supplement (https://plos.figshare.com/articles/dataset/_/117949)
Supplement: Supplementary file [file 1]

Figure S2

A.

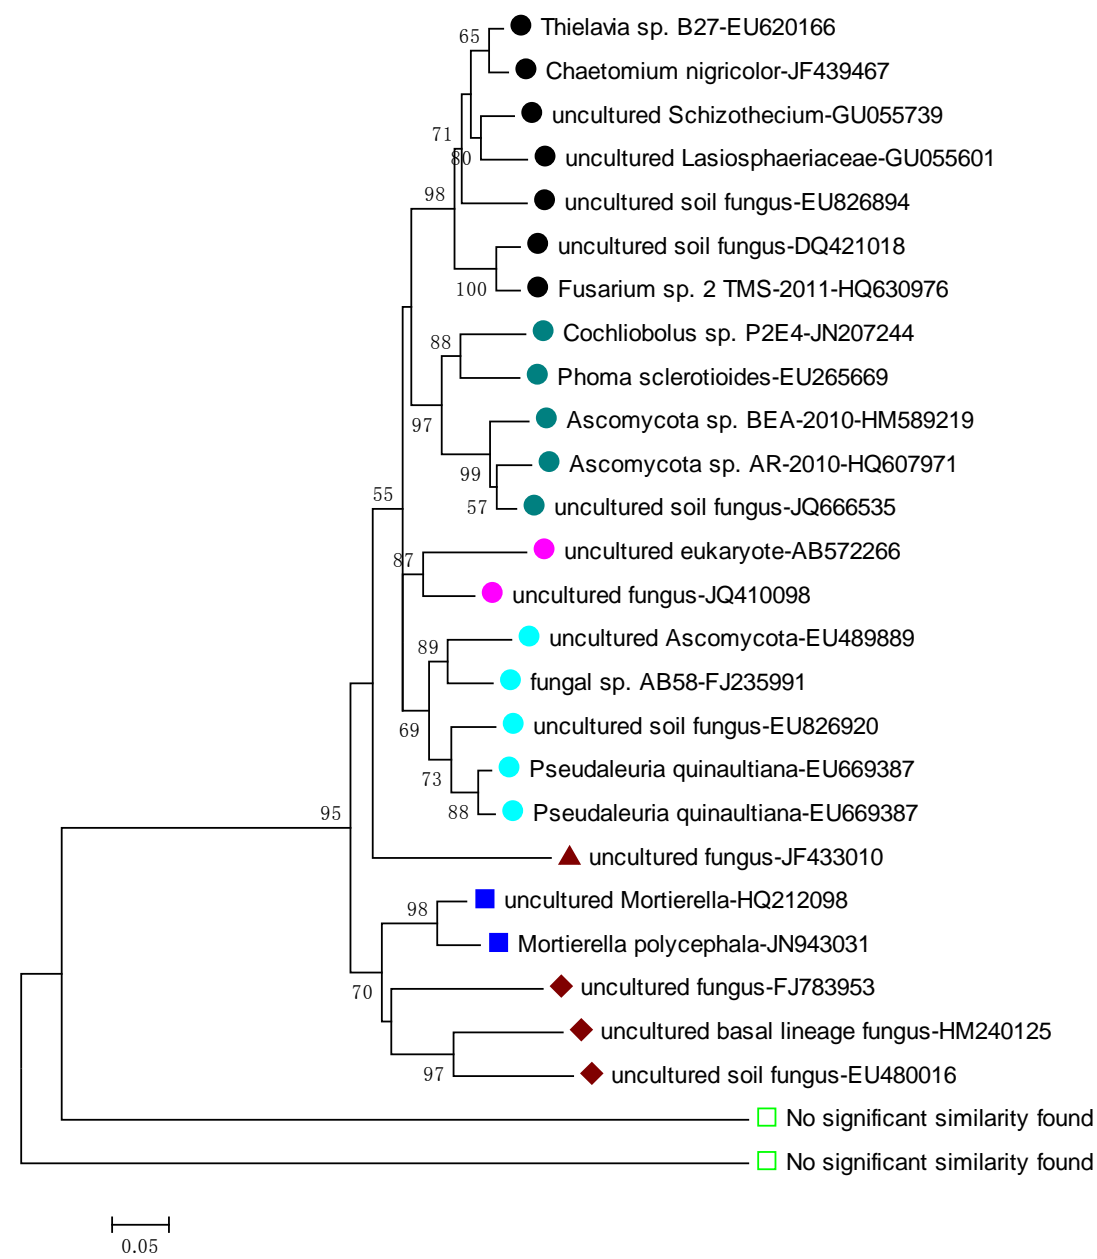

B.

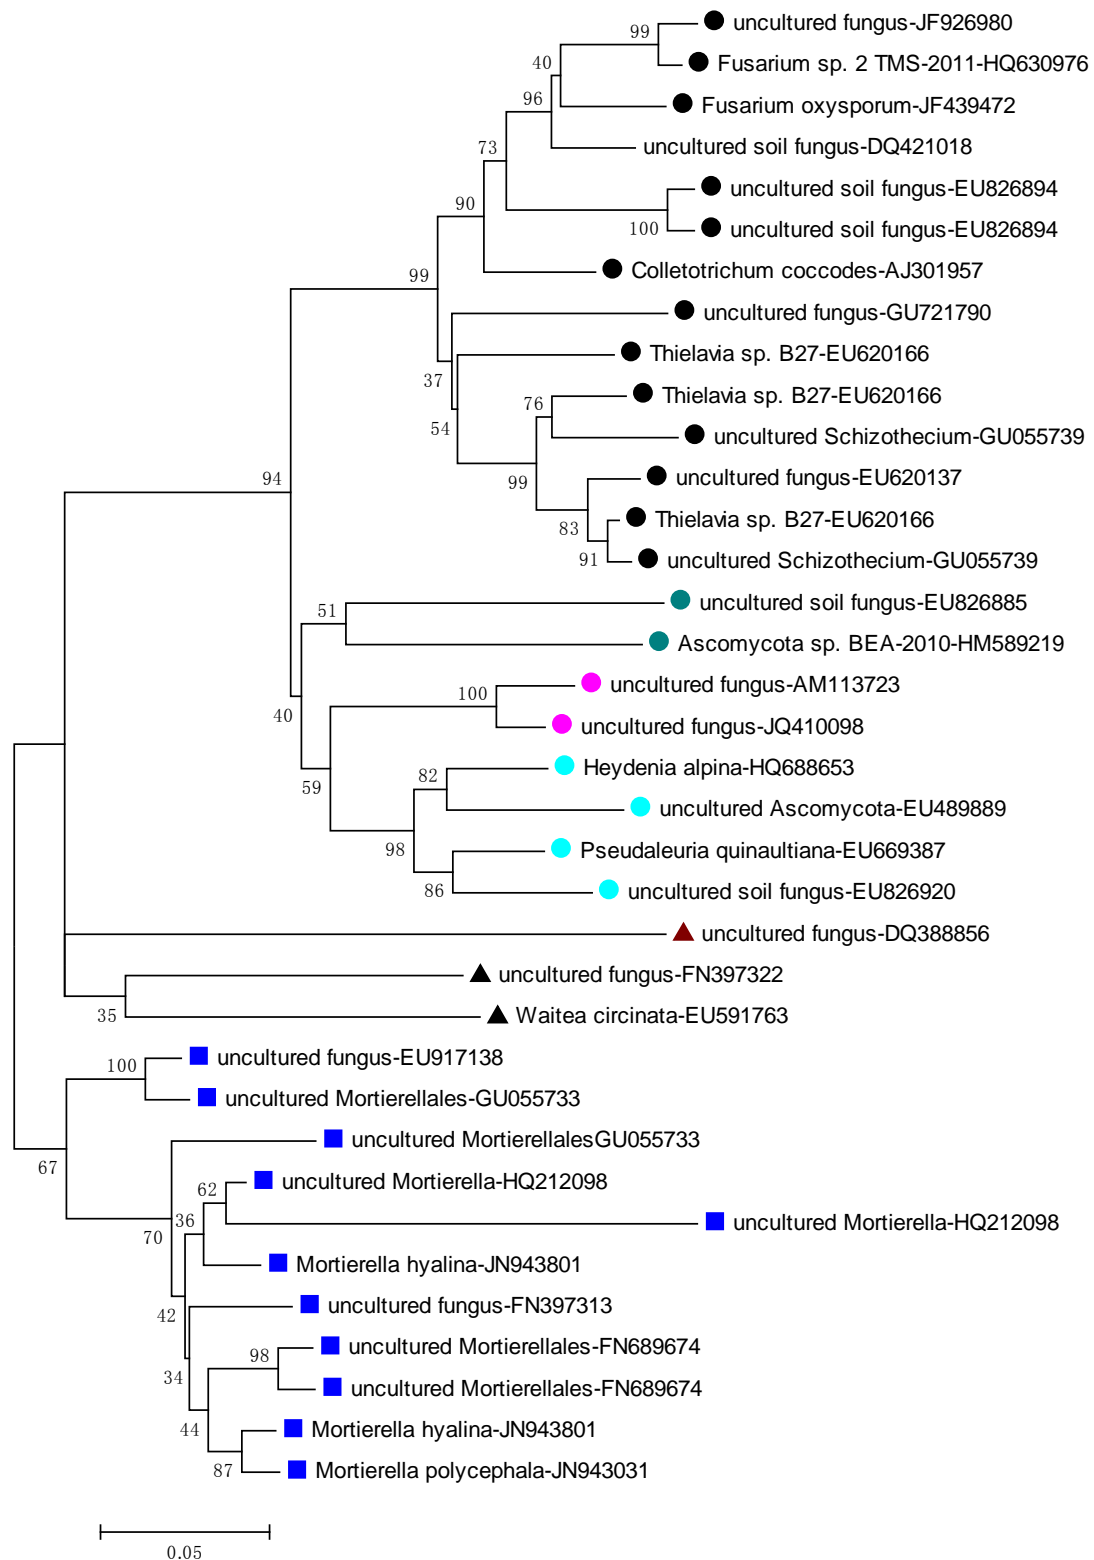

●, *Sordariomycete*; ●, *Dothideomycete*; ●, *Leotiomyce*; ●, *Pezizomycete*; ▲, *Unclassified*; ▲, *Basidiomycota*; ◆, *Chytridiomycota*; ■, *Zygomycota*; □, *Unknown*
